# Supplementary material
Source: Springer Nature journal article supplement (https://www.springermedizin.de/resource/supplementary/12872_2014_786_MOESM9_ESM.docx/9430498)

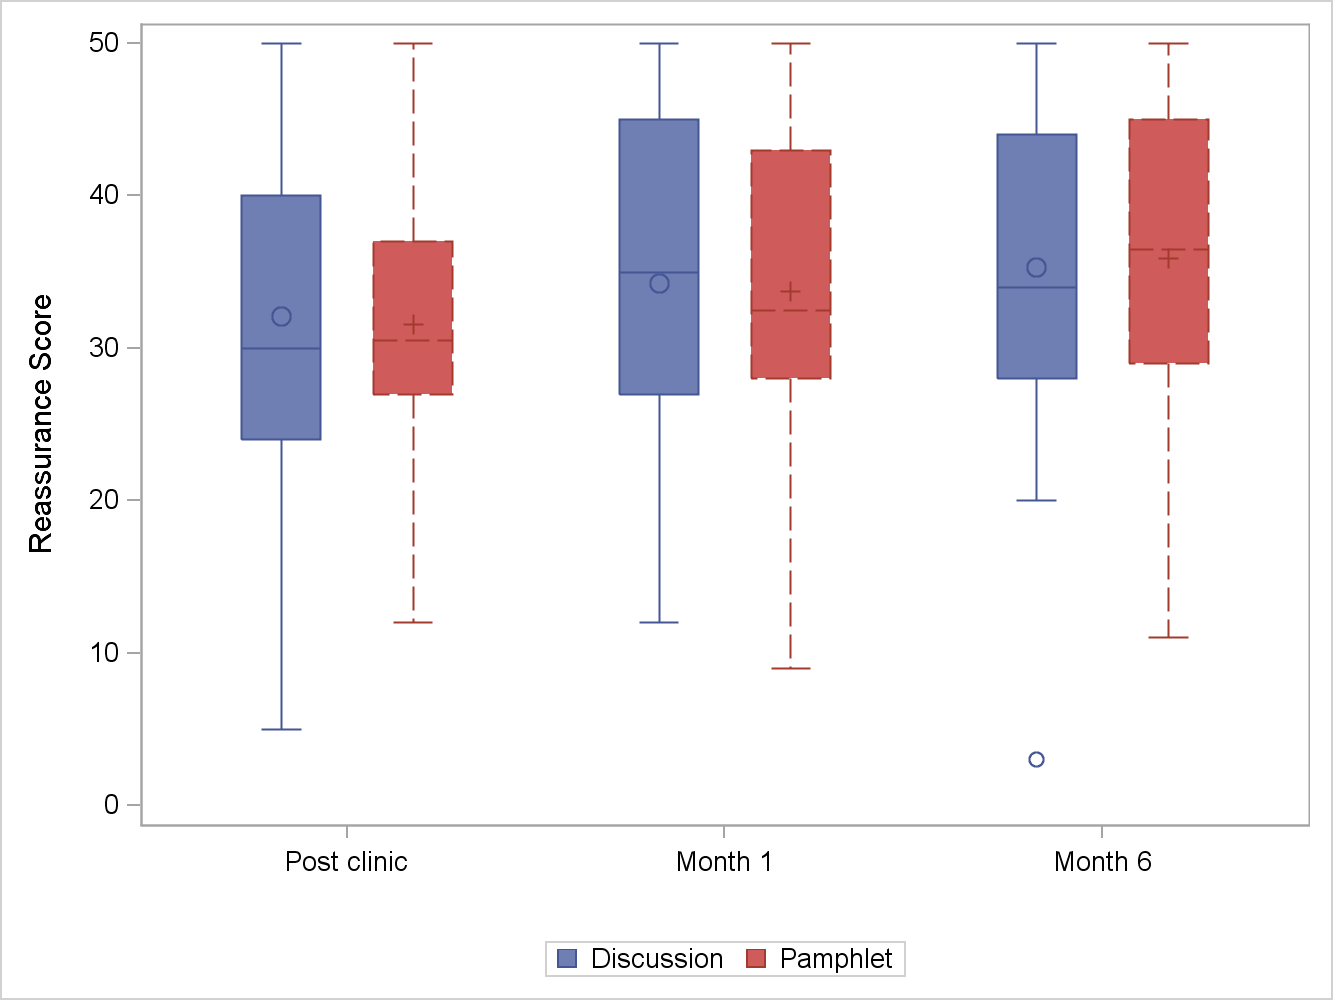

Supplement: MOESM9 [file 9430498]
